# Supplementary material for: Identification of minimal eukaryotic introns through GeneBase, a user-friendly tool for parsing the NCBI Gene databank
Source: PubMed Central journal article supplement — DNA Res. 2015 Nov 17;22(6):495–503. doi: 10.1093/dnares/dsv028 (PMC4675715; doi:10.1093/dnares/dsv028), 2015-11-17
Supplement: supp_dsv028_dsv028supp_figs.pdf [file supp_dsv028_dsv028supp_figs.pdf]

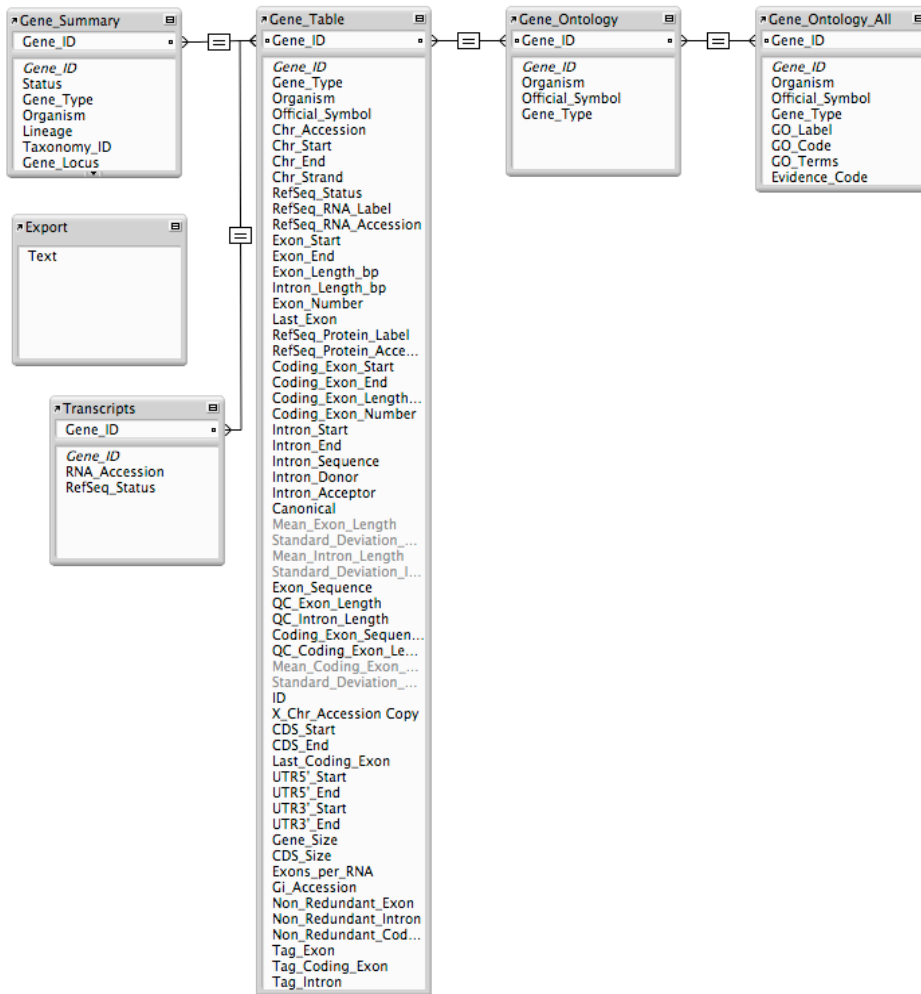

**Supplementary Figure S1.** Graph of GeneBase table relationships. The HTML file generated by FileMaker Pro containing a full description of the database ("Database Design Report") is shown in Supplementary File S1.

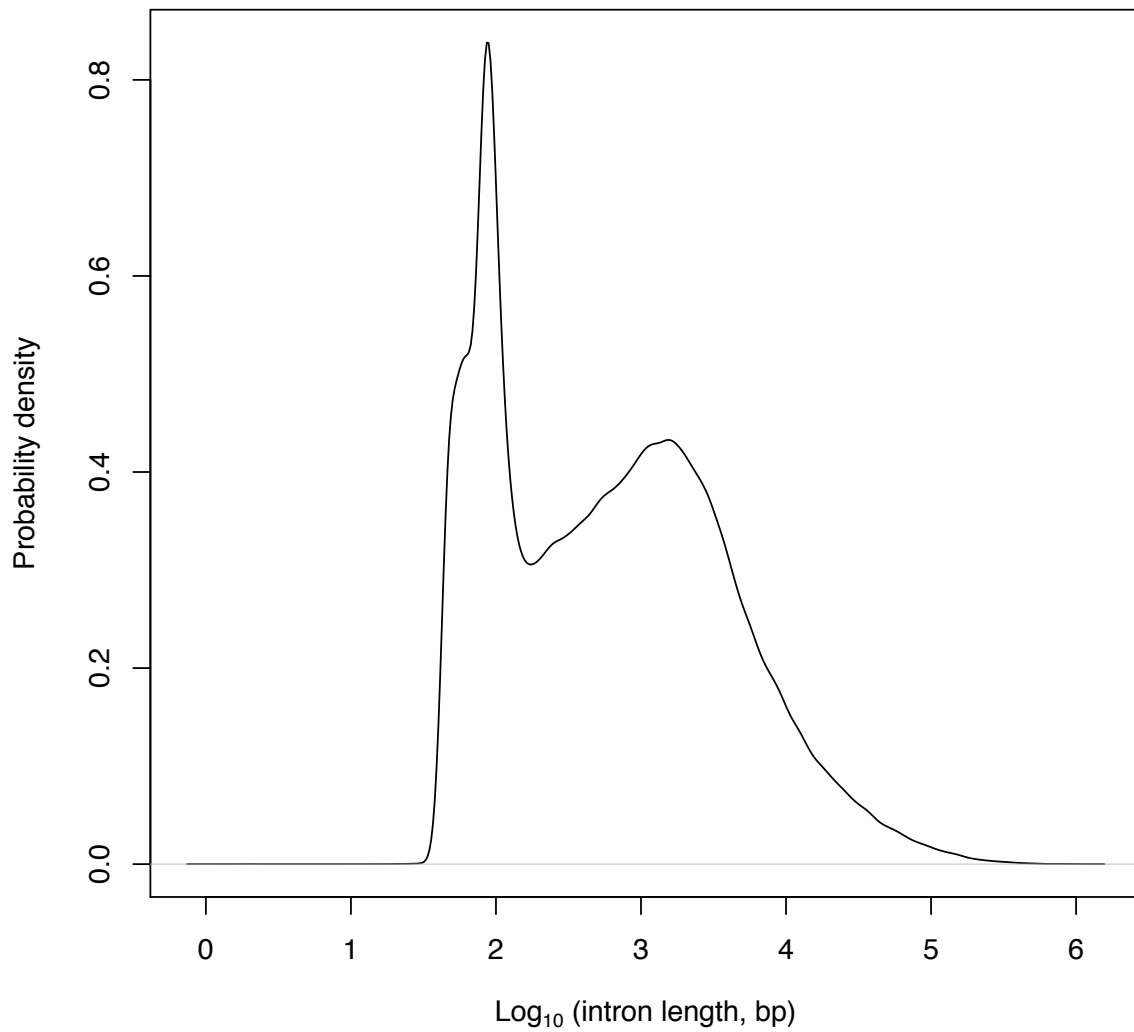

**Supplementary Figure S2.** Intron length distribution considering GeneBase "Gene\_Table" records with a "VALIDATED" or "REVIEWED" RefSeq status, with an "NM\_" or "NR\_" type of corresponding RefSeq RNA accession number.

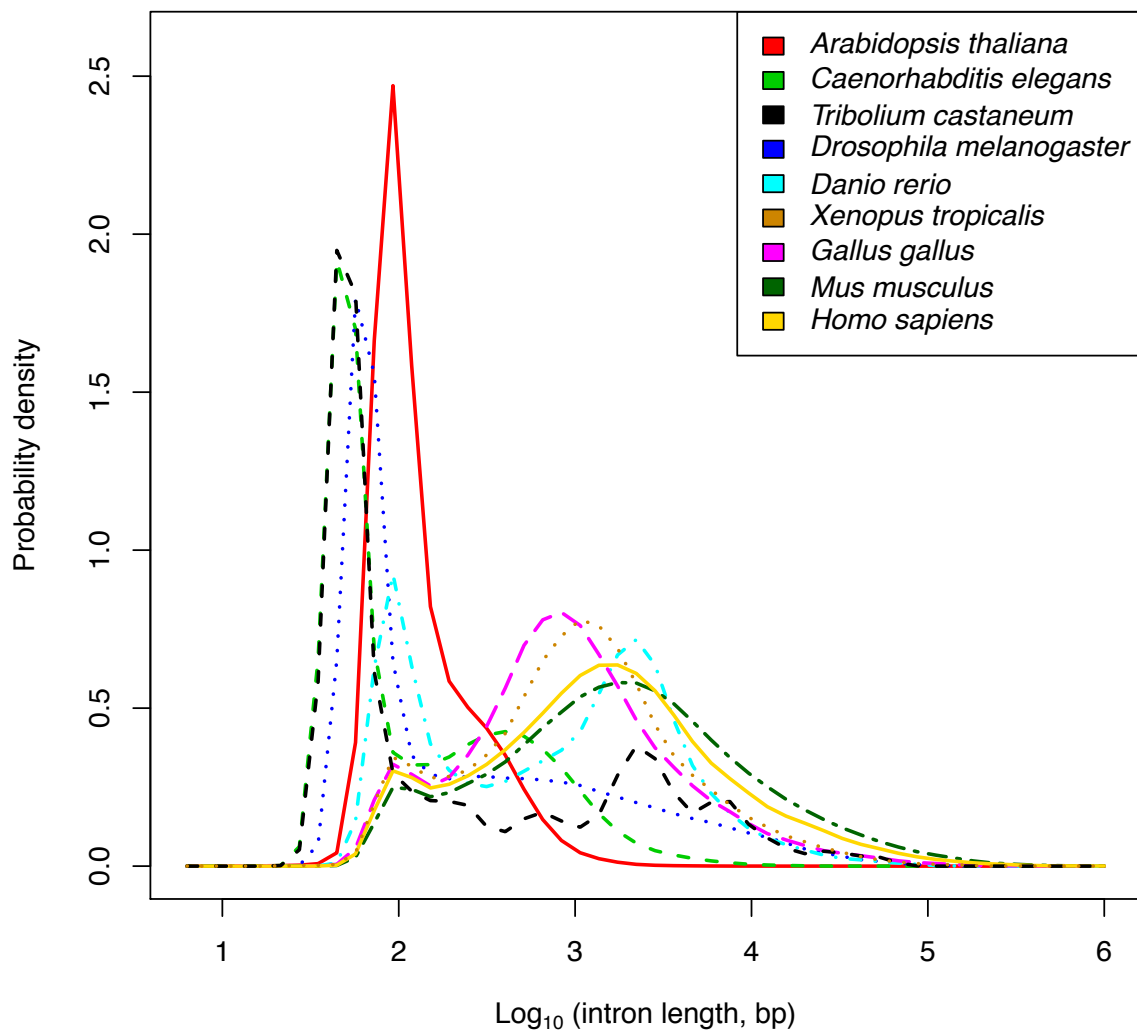

**Supplementary Figure S3.** Intron length distribution in some representative organisms, considering a set of non redundant GeneBase "Gene\_Table" records belonging to gene entries currently annotated on the most recent genome annotation, with a "VALIDATED" or "REVIEWED" RefSeq status and an "NM\_" or "NR\_" type of corresponding RefSeq RNA accession number.

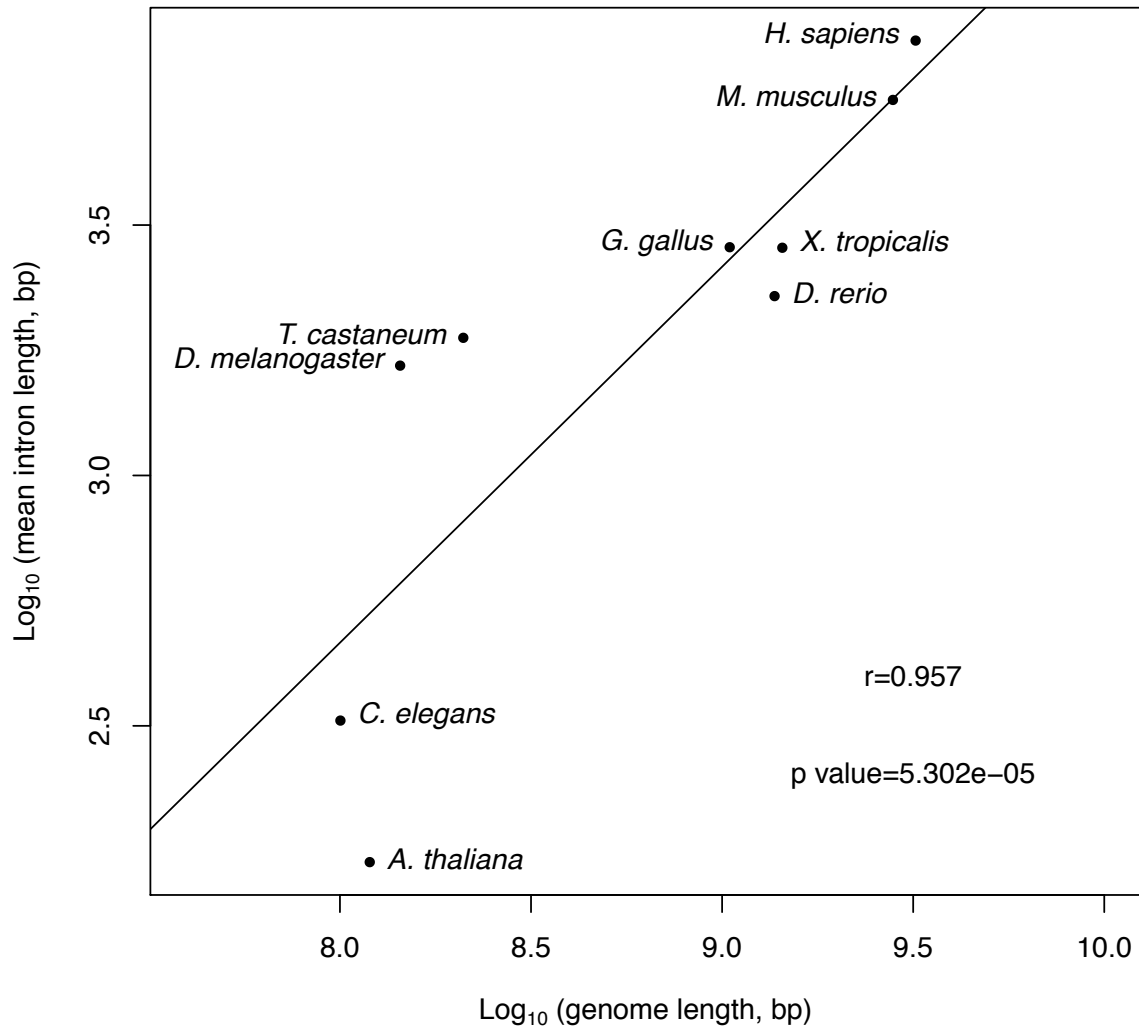

**Supplementary Figure S4.** Correlation between intron and genome lengths in some representative organisms. Mean intron lengths derive from Table 2. Genome lengths derive from NCBI Genome database.

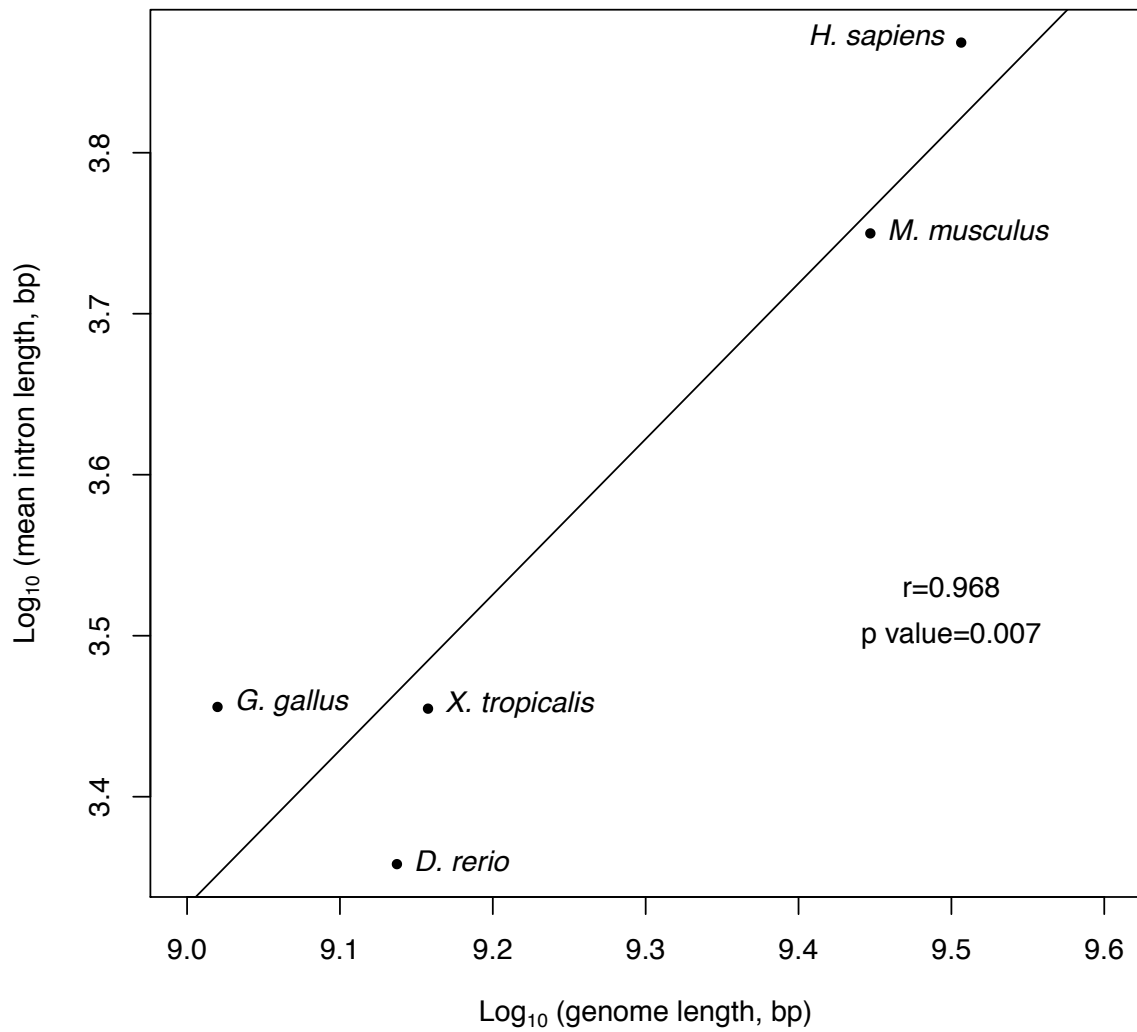

**Supplementary Figure S5.** Correlation between intron and genome lengths in *Vertebrata*. Mean intron lengths derive from Table 2. Genome lengths derive from NCBI Genome database.
